# Supplementary material
Source: MDPI journal article supplement (https://www.mdpi.com/1424-8247/16/2/184)
Supplement: s1 [file s1]

Article

# LncRNA SNHG6 Upregulates KPNA5 to Overcome Gemcitabine Resistance in Pancreatic Cancer via Sponging miR-944

## Supplementary Figure

**A**

|                                  | Predicted consequential pairing of target region (top) and miRNA (bottom) | Site type | Context++ score | Context++ score percentile | Weighted context++ score | Conserved branch length | P <sub>CT</sub> |
|----------------------------------|---------------------------------------------------------------------------|-----------|-----------------|----------------------------|--------------------------|-------------------------|-----------------|
| Position 249-255 of KPNA5 3' UTR | 5' ...UUGUAUCUAUUGGAAUAAUUG...<br>hsa-miR-944<br>3' GAGUAGGCUACAUGUUAUAAA | 7mer-m8   | -0.02           | 56                         | -0.02                    | 0.057                   | N/A             |

**B**

Binding Site of hsa-miR-944 on KPNA5:

| BindingSite                 | Class | Alignment                                                                    | AgoExpNum | CleaveExpNum |
|-----------------------------|-------|------------------------------------------------------------------------------|-----------|--------------|
| chr6:117053839-117053867[+] | 6mer  | Target: 5' agCAGUAAACCUAUUGAUAAUUG 3'<br>miRNA : 3' gaGUAGGCUACAUGUUAUAAA 5' | 12        | 0            |

**C**

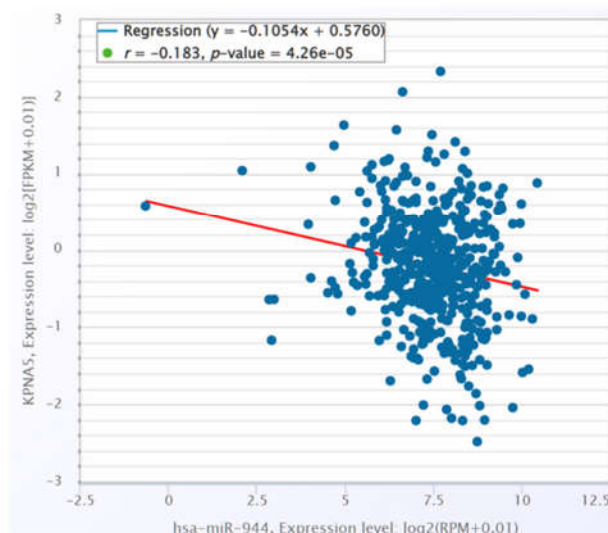

**Figure S1. The interactive relationship between miR-944 and KPNA5.** (A) Binding sites of miR-944 and lncRNA SNHG6, predicted by TargetScan. (B) Binding sites of miR-944 and lncRNA SNHG6, predicted by ENCORI, AgoExpNum, experimentally verified binding sites of KPNA5 to Ago proteins. (C) The correlation between expression of miR-944 and KPNA5, analyzed with ENCORI in pan-Cancer across 32 types of human cancers.
